# Supplementary material for: Patterns of telomere length with age in African mole-rats: New insights from quantitative fluorescence in situ hybridisation (qFISH)
Source: PeerJ. 2020 Dec 4;8:e10498. doi: 10.7717/peerj.10498 (PMC7720729; doi:10.7717/peerj.10498)
Supplement: Supplemental Information 3 — Each value is the fluorescence measurement per cell together with individual identity and age class for each species (separate tabs) as follows: Damaraland mole-rat, DMR; Mahali mole-rat, MMR; and naked mole-rat, NMR. [file peerj-08-10498-s003.xlsx]

## Sheet: DMR
Individual	Age Class	Fluorescence
9.11	1	88054.6
9.11	1	69487.1
9.11	1	56659.2
9.11	1	87258.2
9.11	1	63945.6
9.11	1	69318.2
9.11	1	55203.4
9.11	1	34615.2
9.11	1	64279.8
9.11	1	90990.3
9.11	1	50199.3
9.11	1	61103
9.11	1	49578.3
9.11	1	42842.9
9.11	1	48382.3
9.11	1	71349.6
9.11	1	36044.2
9.11	1	52004.1
9.11	1	66170
9.11	1	79867.7
9.11	1	37083
9.11	1	80240.8
9.11	1	81057.3
9.11	1	104800
9.11	1	49174.4
9.11	1	87476.6
9.11	1	136722
9.11	1	101265
9.11	1	67107.2
9.11	1	71781.2
9.11	1	47279.8
9.11	1	21943.2
9.11	1	26704
9.11	1	84381.4
9.11	1	58745
9.11	1	45042.7
9.11	1	45832.9
9.11	1	15854.1
9.11	1	11662.5
9.11	1	25468.4
9.11	1	63501.6
9.11	1	38272.1
9.11	1	27845.5
9.11	1	78163.3
9.11	1	73461.2
9.11	1	45053.7
9.11	1	108901
9.11	1	84726.9
9.11	1	37412.8
9.11	1	13125.8
11.6	1	148891
11.6	1	160886
11.6	1	84365.6
11.6	1	107070
11.6	1	60817.2
11.6	1	121829
11.6	1	158665
11.6	1	126351
11.6	1	202487
11.6	1	96811.6
11.6	1	175273
11.6	1	199069
11.6	1	174284
11.6	1	73715.5
11.6	1	132056
11.6	1	131068
11.6	1	103276
11.6	1	36951.5
11.6	1	328224
11.6	1	178643
11.6	1	150471
11.6	1	58551
11.6	1	102274
11.6	1	167184
11.6	1	187904
11.6	1	198927
11.6	1	109684
11.6	1	148225
11.6	1	104631
11.6	1	84934
11.6	1	148375
11.6	1	176952
11.6	1	166916
11.6	1	131022
11.6	1	84885.1
11.6	1	113363
11.6	1	188531
11.6	1	102251
11.6	1	160046
11.6	1	165203
11.6	1	97829.9
11.6	1	91120.3
11.6	1	79889.1
11.6	1	209770
11.6	1	141057
11.6	1	112639
11.6	1	222719
11.6	1	168702
11.6	1	200625
11.6	1	71624.3
11.9	1	54725.5
11.9	1	45743.6
11.9	1	72591.2
11.9	1	93520.3
11.9	1	101693
11.9	1	35261.2
11.9	1	100276
11.9	1	87553.8
11.9	1	81652.6
11.9	1	85552.6
11.9	1	99434.7
11.9	1	76802.5
11.9	1	79859.6
11.9	1	72987.1
11.9	1	156830
11.9	1	121638
11.9	1	98960.7
11.9	1	51326.2
11.9	1	27771.4
11.9	1	19319.4
11.9	1	53200.8
11.9	1	22400.5
11.9	1	115051
11.9	1	37927.1
11.9	1	32430.9
11.9	1	25289.4
11.9	1	89738.2
11.9	1	41549.4
11.9	1	77277.6
11.9	1	78148.8
11.9	1	71453
11.9	1	38254.1
11.9	1	67366.8
11.9	1	67451
11.9	1	51322.5
11.9	1	34593.3
11.9	1	13337.1
11.9	1	19514.6
11.9	1	14825.3
11.9	1	9879.59
11.9	1	12121.3
11.9	1	46585.9
11.9	1	12608
11.9	1	77288.2
11.9	1	55834
11.9	1	41162.8
11.9	1	40476.8
11.9	1	22006.6
11.9	1	17446.1
11.9	1	9172.87
11.1	1	22500.8
11.1	1	19495.6
11.1	1	27025.5
11.1	1	16514.5
11.1	1	18744.8
11.1	1	19241.3
11.1	1	33341.4
11.1	1	12905.5
11.1	1	70014.1
11.1	1	26384.8
11.1	1	22853.7
11.1	1	46865.4
11.1	1	37605.2
11.1	1	25304.6
11.1	1	66352
11.1	1	88257.9
11.1	1	74610.2
11.1	1	168568
11.1	1	168600
11.1	1	29361.3
11.1	1	16585.9
11.1	1	37828.8
11.1	1	15846.9
11.1	1	37305.8
11.1	1	51440.5
11.1	1	60839.1
11.1	1	55219.1
11.1	1	42710.8
11.1	1	49124.6
11.1	1	121924
11.1	1	55236
11.1	1	31216.8
11.1	1	32760.1
11.1	1	97850.5
11.1	1	60496.9
11.1	1	23137
11.1	1	24830.1
11.1	1	30329.6
11.1	1	23238.5
11.1	1	59479.6
11.1	1	78348.8
11.1	1	28045.9
11.1	1	60691.4
11.1	1	96144.9
11.1	1	56035.6
11.1	1	115678
11.1	1	111988
11.1	1	126940
11.1	1	94607.7
11.1	1	74246.5
11.11	1	34044.7
11.11	1	34400.1
11.11	1	75422.4
11.11	1	53293.3
11.11	1	55849.1
11.11	1	28323.4
11.11	1	76268.7
11.11	1	15302.4
11.11	1	68241.1
11.11	1	34448.2
11.11	1	88114.6
11.11	1	98012.6
11.11	1	9026.84
11.11	1	30526.5
11.11	1	37385.7
11.11	1	65052.3
11.11	1	83381.9
11.11	1	24683.6
11.11	1	25163.5
11.11	1	30574.1
11.11	1	57153
11.11	1	73330.2
11.11	1	81138.4
11.11	1	19695.1
11.11	1	24203.9
11.11	1	37233.1
11.11	1	29045.4
11.11	1	54766.2
11.11	1	28468.7
11.11	1	53603.6
11.11	1	27036.6
11.11	1	32639.1
11.11	1	32774.4
11.11	1	54119.8
11.11	1	90850.8
11.11	1	34998.5
11.11	1	50910.9
11.11	1	115545
11.11	1	38760.2
11.11	1	63962.1
11.11	1	55383.9
11.11	1	66990.1
11.11	1	62890.5
11.11	1	65434.9
11.11	1	55168.8
11.11	1	38470.1
11.11	1	99815
11.11	1	126691
11.11	1	82971.7
11.11	1	59076.2
9.5	1	44665
9.5	1	16185.7
9.5	1	14716
9.5	1	15577.4
9.5	1	24161.5
9.5	1	17822.6
9.5	1	15165
9.5	1	5274.16
9.5	1	3709.1
9.5	1	16424.2
9.5	1	8403.17
9.5	1	12938.8
9.5	1	5516.62
9.5	1	40384.3
9.5	1	29712.2
9.5	1	11529.1
9.5	1	5921.87
9.5	1	15808.3
9.5	1	9645.34
9.5	1	36063.5
9.5	1	32490.2
9.5	1	31451.7
9.5	1	22605.1
9.5	1	5003.49
9.5	1	41146.7
9.5	1	31531.8
9.5	1	50288.1
9.5	1	50462.6
9.5	1	62292.8
9.5	1	23858.6
9.5	1	10407.8
9.5	1	51081
9.5	1	28613
9.5	1	10750.7
9.5	1	56288
9.5	1	42965.9
9.5	1	4022.63
9.5	1	61693.4
9.5	1	16839.6
9.5	1	9896.25
9.5	1	66886.7
9.5	1	13982.3
9.5	1	28480
9.5	1	22307.9
9.5	1	14844.8
9.5	1	10356.9
9.5	1	24200.2
9.5	1	15250.9
9.5	1	83633.3
9.5	1	37147.6
2.2	5	22336.8
2.2	5	104236
2.2	5	85091.3
2.2	5	122470
2.2	5	117835
2.2	5	49198.8
2.2	5	87644.2
2.2	5	57703.6
2.2	5	75851.6
2.2	5	25652.6
2.2	5	44446.8
2.2	5	30018.4
2.2	5	43131
2.2	5	29855.2
2.2	5	71315.3
2.2	5	40127.3
2.2	5	76524.8
2.2	5	41407.1
2.2	5	35328.5
2.2	5	37681.3
2.2	5	118428
2.2	5	83794.2
2.2	5	38297
2.2	5	86693.5
2.2	5	136068
2.2	5	86629.6
2.2	5	87695.1
2.2	5	37151.2
2.2	5	18127.8
2.2	5	71579.5
2.2	5	107504
2.2	5	87632.9
2.2	5	126167
2.2	5	115919
2.2	5	45185.3
2.2	5	38354.1
2.2	5	69924.9
2.2	5	94543
2.2	5	29860.3
2.2	5	23509.9
2.2	5	11002.5
2.2	5	39515
2.2	5	38605
2.2	5	64087.5
2.2	5	89396.4
2.2	5	29942.6
2.2	5	65968.8
2.2	5	108076
2.2	5	111925
2.2	5	60201
2.5	5	2163.31
2.5	5	46492.2
2.5	5	41244.7
2.5	5	6831.48
2.5	5	7617.25
2.5	5	8373.27
2.5	5	58905
2.5	5	32948.5
2.5	5	11772.6
2.5	5	4874.25
2.5	5	4072.7
2.5	5	5306.19
2.5	5	16460.9
2.5	5	35077.6
2.5	5	13646.7
2.5	5	42136.2
2.5	5	33166.6
2.5	5	11035.5
2.5	5	11050.6
2.5	5	42762.8
2.5	5	43323.8
2.5	5	7128.12
2.5	5	2134.97
2.5	5	29797.6
2.5	5	9721.18
2.5	5	9451.49
2.5	5	8248.49
2.5	5	21245.5
2.5	5	2440.29
2.5	5	44054.7
2.5	5	14106.6
2.5	5	60701
2.5	5	27280.6
2.5	5	7877.13
2.5	5	2489.54
2.5	5	2173.06
2.5	5	3073.19
2.5	5	23566.4
2.5	5	5319.84
2.5	5	4148.51
2.5	5	87504.9
2.5	5	6619.62
2.5	5	2631.01
2.5	5	4789.83
2.5	5	12375.5
2.5	5	2720.94
2.5	5	13349.9
2.5	5	32927.9
2.5	5	2636.77
2.5	5	5988.85
2.6	5	9517.47
2.6	5	3019.15
2.6	5	2257.11
2.6	5	1134.57
2.6	5	31676.7
2.6	5	18445.3
2.6	5	2202.12
2.6	5	2000.82
2.6	5	6575.72
2.6	5	9774.87
2.6	5	12497.3
2.6	5	1780.41
2.6	5	2775
2.6	5	4205.3
2.6	5	5426.7
2.6	5	753.501
2.6	5	24454.6
2.6	5	16123.5
2.6	5	38301
2.6	5	4469.39
2.6	5	5687
2.6	5	2597.84
2.6	5	3009.75
2.6	5	3472.09
2.6	5	1903.55
2.6	5	9735.91
2.6	5	9200.39
2.6	5	4328.46
2.6	5	2602.37
2.6	5	3891.21
2.6	5	22741.6
2.6	5	14781.7
2.6	5	14469.9
2.6	5	23970.1
2.6	5	27049.4
2.6	5	21528.8
2.6	5	6854.51
2.6	5	5531.85
2.6	5	34299.2
2.6	5	19088.9
2.6	5	5662.07
2.6	5	1779.9
2.6	5	7137.94
2.6	5	89271.8
2.6	5	10154.3
2.6	5	5559.57
2.6	5	3818.63
2.6	5	11606
2.6	5	4170.46
2.6	5	2252.01
8.4	5	70077.5
8.4	5	20590.8
8.4	5	46361.6
8.4	5	9065.38
8.4	5	35096.8
8.4	5	20110.9
8.4	5	37206.6
8.4	5	41300.7
8.4	5	44661.3
8.4	5	21157.8
8.4	5	34826.6
8.4	5	51684.7
8.4	5	42056.5
8.4	5	22344.4
8.4	5	35627
8.4	5	18806.8
8.4	5	29023.3
8.4	5	31130.3
8.4	5	48614.5
8.4	5	18917.6
8.4	5	21374.6
8.4	5	10414
8.4	5	56513.7
8.4	5	77667.5
8.4	5	31148
8.4	5	10311.5
8.4	5	30518
8.4	5	62607.2
8.4	5	12681.5
8.4	5	27956.8
8.4	5	26814.4
8.4	5	7381.15
8.4	5	17229.2
8.4	5	12177.7
8.4	5	32427.6
8.4	5	43753.9
8.4	5	34626.4
8.4	5	40954.4
8.4	5	44410.2
8.4	5	90800.7
8.4	5	103180
8.4	5	19628.8
8.4	5	40263.7
8.4	5	37564.5
8.4	5	81167.7
8.4	5	42264
8.4	5	6847.48
8.4	5	44645.4
8.4	5	62509.8
8.4	5	40130.8
8.5	5	10518
8.5	5	24396
8.5	5	34301.4
8.5	5	50981.8
8.5	5	11373.9
8.5	5	16880.8
8.5	5	20357
8.5	5	19084
8.5	5	61302.7
8.5	5	13387.1
8.5	5	23354.6
8.5	5	12939.7
8.5	5	40643.1
8.5	5	19657.2
8.5	5	9606.17
8.5	5	23406.1
8.5	5	15018
8.5	5	9006.85
8.5	5	34959.3
8.5	5	12511.3
8.5	5	29603.6
8.5	5	8845.11
8.5	5	4425.82
8.5	5	21565.3
8.5	5	28841.3
8.5	5	49267.4
8.5	5	26348.4
8.5	5	92290.3
8.5	5	14561.5
8.5	5	37587.6
8.5	5	5907.2
8.5	5	20354.2
8.5	5	47231.8
8.5	5	17940.3
8.5	5	9463.28
8.5	5	4590.79
8.5	5	34155.2
8.5	5	30340.6
8.5	5	22240.8
8.5	5	15839.8
8.5	5	50581.6
8.5	5	53046.6
8.5	5	24677.2
8.5	5	4703.31
8.5	5	23785
8.5	5	2324.11
8.5	5	18434.3
8.5	5	7837.57
8.5	5	1909.84
8.5	5	13841.3
9.13	5	69189.8
9.13	5	82144.5
9.13	5	51323.2
9.13	5	116590
9.13	5	74695
9.13	5	94986.1
9.13	5	113694
9.13	5	53884.1
9.13	5	55340.3
9.13	5	126492
9.13	5	63664.5
9.13	5	52989.8
9.13	5	71088.2
9.13	5	90799.6
9.13	5	55107.5
9.13	5	26840.6
9.13	5	34495.5
9.13	5	65108.4
9.13	5	37211.1
9.13	5	114959
9.13	5	37660.4
9.13	5	112771
9.13	5	98439.1
9.13	5	67057.8
9.13	5	102257
9.13	5	58751.4
9.13	5	115251
9.13	5	59102.8
9.13	5	31821
9.13	5	77413.1
9.13	5	99743.3
9.13	5	37924
9.13	5	36101.5
9.13	5	93185.7
9.13	5	162161
9.13	5	32311.6
9.13	5	173812
9.13	5	183560
9.13	5	83234.6
9.13	5	41314.2
9.13	5	47261
9.13	5	110776
9.13	5	119148
9.13	5	60549.9
9.13	5	61454.7
9.13	5	42786.2
9.13	5	115039
9.13	5	72909.8
9.13	5	48831.5
9.13	5	94141.3

## Sheet: MMR
Individual	Age Class	Fluorescence
7.1	2	10342
7.1	2	12921.7
7.1	2	21534.1
7.1	2	17100.3
7.1	2	32957.5
7.1	2	19919.7
7.1	2	63080.7
7.1	2	27193.5
7.1	2	31253.7
7.1	2	55281.2
7.1	2	38728.8
7.1	2	52464.4
7.1	2	55133.3
7.1	2	47810.6
7.1	2	81867.1
7.1	2	30355.5
7.1	2	42328.9
7.1	2	46789.3
7.1	2	23031.2
7.1	2	62737
7.1	2	16405.2
7.1	2	43574.2
7.1	2	16043.1
7.1	2	45727.1
7.1	2	43835.9
7.1	2	30275.7
7.1	2	52706.1
7.1	2	51847.5
7.1	2	21566.4
7.1	2	23608.9
7.1	2	33412
7.1	2	16813.1
7.1	2	48968.6
7.1	2	20669.8
7.1	2	50573.2
7.1	2	50220.5
7.1	2	29880.3
7.1	2	30676.4
7.1	2	40784.5
7.1	2	30904.4
7.1	2	39634.6
7.1	2	23761.7
7.1	2	22768.1
7.1	2	28657.6
7.1	2	45379.7
7.1	2	48304.7
7.1	2	64392.2
7.1	2	17484.6
7.1	2	18012
7.1	2	9591.58
7.2	2	21635.4
7.2	2	19402.2
7.2	2	27924.9
7.2	2	45960.2
7.2	2	9650.01
7.2	2	4695.94
7.2	2	8455.3
7.2	2	4978.7
7.2	2	5912.32
7.2	2	6958.03
7.2	2	8511.88
7.2	2	12999.1
7.2	2	35151.2
7.2	2	14018.9
7.2	2	19569.2
7.2	2	37247.7
7.2	2	47647.3
7.2	2	5546.6
7.2	2	15022.5
7.2	2	26776.5
7.2	2	23649.3
7.2	2	34909.8
7.2	2	7496.36
7.2	2	18154.1
7.2	2	7702.56
7.2	2	15146.8
7.2	2	22052
7.2	2	8126.05
7.2	2	35287.6
7.2	2	41089.3
7.2	2	27838.2
7.2	2	31743.9
7.2	2	24722.3
7.2	2	10539.9
7.2	2	19188.5
7.2	2	18744.2
7.2	2	14178.7
7.2	2	15823.9
7.2	2	23198.9
7.2	2	20054.8
7.2	2	50642.3
7.2	2	18156.3
7.2	2	37803.5
7.2	2	38285.3
7.2	2	56162.5
7.2	2	31734.2
7.2	2	20594.8
7.2	2	12824.9
7.2	2	8367.88
7.2	2	29623.5
10.1	3	13284.8
10.1	3	5201.43
10.1	3	11278.9
10.1	3	7095.86
10.1	3	9893.02
10.1	3	11266.7
10.1	3	12020.2
10.1	3	4169.46
10.1	3	10124.8
10.1	3	11529
10.1	3	11323.3
10.1	3	48138.6
10.1	3	11704.8
10.1	3	6519.02
10.1	3	17585.8
10.1	3	6372.54
10.1	3	9913.52
10.1	3	3497.36
10.1	3	31939.9
10.1	3	17474
10.1	3	21099.3
10.1	3	22548.6
10.1	3	28366.9
10.1	3	21424.2
10.1	3	43876.4
10.1	3	6448.32
10.1	3	11438.1
10.1	3	6127.98
10.1	3	12763.3
10.1	3	6741.65
10.1	3	12243.8
10.1	3	20492.3
10.1	3	15937.4
10.1	3	34886.1
10.1	3	6366.14
10.1	3	21998.4
10.1	3	14452.2
10.1	3	20444.5
10.1	3	19116.4
10.1	3	23846.1
10.1	3	14605.7
10.1	3	28904.6
10.1	3	38232.4
10.1	3	20848.1
10.1	3	19179.1
10.1	3	14746.1
10.1	3	18754.2
10.1	3	35542.8
10.1	3	11681.9
10.1	3	14647.1
12.1	3	53700.9
12.1	3	47169.3
12.1	3	57731.1
12.1	3	67694.1
12.1	3	83048.8
12.1	3	86258.8
12.1	3	40417.3
12.1	3	51445.4
12.1	3	76676.5
12.1	3	57870.6
12.1	3	42057.7
12.1	3	45377.5
12.1	3	103212
12.1	3	136061
12.1	3	98795.7
12.1	3	70236.6
12.1	3	36359.9
12.1	3	5885.28
12.1	3	33474.4
12.1	3	47497.7
12.1	3	54647
12.1	3	51325.2
12.1	3	44896.9
12.1	3	61692.4
12.1	3	52211.2
12.1	3	52375.2
12.1	3	47224.6
12.1	3	38120.1
12.1	3	8829.5
12.1	3	40399.1
12.1	3	33809.9
12.1	3	46292.7
12.1	3	57013.6
12.1	3	44785.3
12.1	3	109819
12.1	3	80073.8
12.1	3	56786.9
12.1	3	43278.9
12.1	3	40521.6
12.1	3	42054.7
12.1	3	46825.9
12.1	3	57599.5
12.1	3	51210.1
12.1	3	43821.6
12.1	3	48303.7
12.1	3	45333.3
12.1	3	81544.3
12.1	3	46030.5
12.1	3	44535.1
12.1	3	53139.9
12.2	3	10362.7
12.2	3	15907.4
12.2	3	20185.4
12.2	3	30138.6
12.2	3	28993.1
12.2	3	26658.9
12.2	3	28413.4
12.2	3	35756.9
12.2	3	38030.5
12.2	3	35606.5
12.2	3	41926.6
12.2	3	35591.6
12.2	3	52501.6
12.2	3	29065.1
12.2	3	42726.3
12.2	3	29938
12.2	3	30350.6
12.2	3	55788.3
12.2	3	59678.3
12.2	3	44210.1
12.2	3	29410.3
12.2	3	20720.5
12.2	3	37209
12.2	3	68809.3
12.2	3	28079.9
12.2	3	27107.2
12.2	3	28016
12.2	3	61354.6
12.2	3	44933
12.2	3	10842.7
12.2	3	23018.9
12.2	3	25156.9
12.2	3	33194.2
12.2	3	37491.2
12.2	3	32385.4
12.2	3	73913.5
12.2	3	55098.1
12.2	3	59716.8
12.2	3	49558.4
12.2	3	45804.5
12.2	3	46867.5
12.2	3	37005.3
12.2	3	29146.7
12.2	3	34401.3
12.2	3	12441.1
12.2	3	44020.1
12.2	3	24331.9
12.2	3	41058.1
12.2	3	47854.6
12.2	3	41077
12.3	2	61409.6
12.3	2	51076.2
12.3	2	34831.3
12.3	2	53994.7
12.3	2	46317.9
12.3	2	34766.9
12.3	2	27892.9
12.3	2	43359.6
12.3	2	60326.6
12.3	2	40827.1
12.3	2	35063.2
12.3	2	43162.4
12.3	2	57302.5
12.3	2	23167.4
12.3	2	41785.2
12.3	2	64703.2
12.3	2	59413.7
12.3	2	18018.8
12.3	2	43800.3
12.3	2	38859.5
12.3	2	52129.8
12.3	2	38481.5
12.3	2	56345.2
12.3	2	52835.7
12.3	2	24615.8
12.3	2	58981.2
12.3	2	37369.2
12.3	2	66477.8
12.3	2	27898.6
12.3	2	43797.1
12.3	2	73262
12.3	2	65360.3
12.3	2	17878.1
12.3	2	25158.6
12.3	2	16000.9
12.3	2	62071.9
12.3	2	16698.6
12.3	2	50908.4
12.3	2	40741.7
12.3	2	27848.1
12.3	2	53453.1
12.3	2	38890.6
12.3	2	40587.1
12.3	2	27420.3
12.3	2	59662.9
12.3	2	36067.7
12.3	2	81549.7
12.3	2	35608.5
12.3	2	70079.8
12.4	3	58722.1
12.4	3	51359.8
12.4	3	68513.8
12.4	3	62186.2
12.4	3	59762.1
12.4	3	54367.2
12.4	3	40328.3
12.4	3	20159.8
12.4	3	29551.1
12.4	3	36926.2
12.4	3	38394.5
12.4	3	64889.2
12.4	3	30970.1
12.4	3	57633.2
12.4	3	37671.6
12.4	3	42380.7
12.4	3	50259.2
12.4	3	88298.3
12.4	3	53592.7
12.4	3	45856.3
12.4	3	36953.9
12.4	3	36597.4
12.4	3	41420.9
12.4	3	41833
12.4	3	19719.9
12.4	3	53588.6
12.4	3	39773.4
12.4	3	31809.6
12.4	3	46751.6
12.4	3	39388.1
12.4	3	73389.6
12.4	3	61398.4
12.4	3	23736.2
12.4	3	27205.5
12.4	3	41961.9
12.4	3	15225.8
12.4	3	58130.2
12.4	3	41616.7
12.4	3	49424.8
12.4	3	38957.7
12.4	3	59007.4
12.4	3	64075.8
12.4	3	49897.7
12.4	3	52665.9
12.4	3	45199
12.4	3	29775
12.4	3	39125
12.4	3	72204.8
12.4	3	63915.4
12.4	3	23555.5
12.5	2	21420.3
12.5	2	21626.6
12.5	2	31703.5
12.5	2	50956.3
12.5	2	47529.1
12.5	2	47813.9
12.5	2	28509.4
12.5	2	32853.8
12.5	2	40349.5
12.5	2	52306.2
12.5	2	24042.9
12.5	2	33557.5
12.5	2	41836.8
12.5	2	27221
12.5	2	52148.4
12.5	2	47328.6
12.5	2	16410.2
12.5	2	20778.2
12.5	2	43415.5
12.5	2	77700.3
12.5	2	38247
12.5	2	46100.8
12.5	2	36511
12.5	2	26692.2
12.5	2	35483.5
12.5	2	35203.9
12.5	2	40349.6
12.5	2	35020
12.5	2	29765.2
12.5	2	34350.4
12.5	2	55153.6
12.5	2	53953.6
12.5	2	33249
12.5	2	72705.5
12.5	2	30171.5
12.5	2	59580.7
12.5	2	20394.9
12.5	2	42476.2
12.5	2	19836.5
12.5	2	28077.2
12.5	2	24802.9
12.5	2	36929
12.5	2	28704.1
12.5	2	27728.7
12.5	2	30712.7
12.5	2	54616.2
12.5	2	33044
12.5	2	38271.9
12.5	2	44397.5
12.5	2	70866.1
12.6	2	6329.23
12.6	2	16257.8
12.6	2	7694.2
12.6	2	6317.52
12.6	2	15340.2
12.6	2	15165.6
12.6	2	9581.6
12.6	2	9455.82
12.6	2	9163.03
12.6	2	6928.36
12.6	2	9319.6
12.6	2	23643.1
12.6	2	25909.5
12.6	2	6969.97
12.6	2	20468
12.6	2	21434.8
12.6	2	46435.8
12.6	2	28610.1
12.6	2	23020.7
12.6	2	10905.3
12.6	2	29115
12.6	2	12618.9
12.6	2	11641.5
12.6	2	23610.8
12.6	2	6404.72
12.6	2	26241.4
12.6	2	5183.44
12.6	2	7544.5
12.6	2	9554.46
12.6	2	32077.9
12.6	2	14221.4
12.6	2	7389.94
12.6	2	19021.4
12.6	2	21798.7
12.6	2	30224.9
12.6	2	23147.3
12.6	2	8410.09
12.6	2	7633.16
12.6	2	15691.4
12.6	2	16280.8
12.6	2	31073.4
12.6	2	17932.8
12.6	2	36679.3
12.6	2	45292.6
12.6	2	31314.6
12.6	2	12700.7
12.6	2	20335.2
12.6	2	21658.7
12.6	2	39422.9
12.6	2	23964.5
12.7	2	23428.1
12.7	2	10798.9
12.7	2	6388.47
12.7	2	52897.9
12.7	2	3919.37
12.7	2	9107.09
12.7	2	14134.9
12.7	2	5900.99
12.7	2	22093
12.7	2	21118.3
12.7	2	11859.3
12.7	2	68199.7
12.7	2	5760.29
12.7	2	12813.3
12.7	2	5752.39
12.7	2	9384.25
12.7	2	14390.3
12.7	2	5229.05
12.7	2	7849.61
12.7	2	20005
12.7	2	23847.6
12.7	2	11526.2
12.7	2	30174
12.7	2	59066.2
12.7	2	43985.4
12.7	2	13577.7
12.7	2	37103.5
12.7	2	27633
12.7	2	39087.9
12.7	2	42432.3
12.7	2	47874.6
12.7	2	12831.7
12.7	2	19291.3
12.7	2	12025.8
12.7	2	20107.6
12.7	2	33763.2
12.7	2	13624.7
12.7	2	16335.7
12.7	2	52496.7
12.7	2	51970.2
12.7	2	14837.9
12.7	2	14881.9
12.7	2	15553.6
12.7	2	13494.5
12.7	2	8669.04
12.7	2	22884.2
12.7	2	34335.5
12.7	2	26692.1
12.7	2	24528.9
12.7	2	29430.4
12.8	2	45638.6
12.8	2	67637.2
12.8	2	70450.9
12.8	2	46907.1
12.8	2	138200
12.8	2	41073.2
12.8	2	26815.7
12.8	2	51056.6
12.8	2	59536.5
12.8	2	61243.6
12.8	2	65196.3
12.8	2	18358.7
12.8	2	18230.7
12.8	2	34685.8
12.8	2	35887.1
12.8	2	41287.3
12.8	2	40925.4
12.8	2	43881.7
12.8	2	38739.7
12.8	2	23487.3
12.8	2	60396.6
12.8	2	41974.2
12.8	2	41426.9
12.8	2	59235.9
12.8	2	46749
12.8	2	66805.5
12.8	2	60660.6
12.8	2	65735.7
12.8	2	48392.4
12.8	2	45432.1
12.8	2	30359
12.8	2	46685.5
12.8	2	45398.2
12.8	2	55198.9
12.8	2	43035.2
12.8	2	54377.1
12.8	2	63346.6
12.8	2	52512.8
12.8	2	78194
12.8	2	61382.1
12.8	2	66766.6
12.8	2	48062.1
12.8	2	28045.1
12.8	2	16749.4
12.8	2	52814.2
12.8	2	99456.5
12.8	2	61413.6
12.8	2	45085.9
12.8	2	58002.9
12.8	2	41442.4
12.9	2	41573.4
12.9	2	17999.3
12.9	2	12385.6
12.9	2	3965.5
12.9	2	16744.3
12.9	2	9389.61
12.9	2	13387.4
12.9	2	10808.1
12.9	2	5495.81
12.9	2	7475.41
12.9	2	3882.89
12.9	2	10320.5
12.9	2	21872.6
12.9	2	18125.1
12.9	2	5337.3
12.9	2	21478.3
12.9	2	6521.64
12.9	2	23537.7
12.9	2	13026.3
12.9	2	10684.3
12.9	2	11464.5
12.9	2	10616.7
12.9	2	17636.5
12.9	2	20715.4
12.9	2	26654.2
12.9	2	68931.3
12.9	2	22948.2
12.9	2	14357.1
12.9	2	8160.72
12.9	2	17164.8
12.9	2	11038.6
12.9	2	12942
12.9	2	18568.3
12.9	2	8110.6
12.9	2	9997.15
12.9	2	31516.4
12.9	2	7564.18
12.9	2	14529.9
12.9	2	11895.3
12.9	2	10580.7
12.9	2	12650.4
12.9	2	21063
12.9	2	20815
12.9	2	48448.2
12.9	2	21357.8
12.9	2	10194.9
12.9	2	7187.78
12.9	2	9962.6
12.9	2	6922.81
12.9	2	22169.4
12.1	3	9641.16
12.1	3	15337.5
12.1	3	12133.2
12.1	3	29007.5
12.1	3	51846.5
12.1	3	31565
12.1	3	26525.2
12.1	3	35240.7
12.1	3	39046.7
12.1	3	23549.2
12.1	3	28951.4
12.1	3	34231.5
12.1	3	14785.5
12.1	3	13635
12.1	3	2346.06
12.1	3	45001.7
12.1	3	45282.9
12.1	3	25844.1
12.1	3	20984.6
12.1	3	10590.1
12.1	3	22851.5
12.1	3	33864.2
12.1	3	19764.9
12.1	3	23630.6
12.1	3	15829.2
12.1	3	10507.7
12.1	3	14291.2
12.1	3	21403.2
12.1	3	9250.76
12.1	3	18284.6
12.1	3	16496.8
12.1	3	15073.3
12.1	3	3970.4
12.1	3	13879.2
12.1	3	33783.9
12.1	3	14146
12.1	3	25528
12.1	3	8632.87
12.1	3	19906.4
12.1	3	16912.2
12.1	3	26460.4
12.1	3	35080.3
12.1	3	40108.9
12.1	3	48558.2
12.1	3	27952
12.1	3	30203.6
12.1	3	39574.3
12.1	3	31673
12.1	3	29231.9
12.1	3	42475.9
12.11	2	21005.6
12.11	2	50789.4
12.11	2	61217.3
12.11	2	68542.6
12.11	2	70308.4
12.11	2	61764.4
12.11	2	47111.5
12.11	2	70371.5
12.11	2	37329.8
12.11	2	77398.6
12.11	2	57187.5
12.11	2	55741
12.11	2	37713.1
12.11	2	59769.4
12.11	2	39411.6
12.11	2	58197.9
12.11	2	85400.7
12.11	2	50718.7
12.11	2	38483.3
12.11	2	61550.5
12.11	2	78945.2
12.11	2	76550.1
12.11	2	73564.2
12.11	2	69061.6
12.11	2	41623.2
12.11	2	86532.6
12.11	2	52137.4
12.11	2	35300.5
12.11	2	33641.4
12.11	2	52390
12.11	2	55501.5
12.11	2	31700.4
12.11	2	56875.3
12.11	2	38088
12.11	2	56104.6
12.11	2	61819.4
12.11	2	42920.3
12.11	2	49805.8
12.11	2	30967.1
12.11	2	66562.8
12.11	2	50167
12.11	2	74089.6
12.11	2	61459.6
12.11	2	110820
12.11	2	58227.2
12.11	2	50433.6
12.11	2	37614.5
12.11	2	48205.3
12.11	2	43984.9
12.11	2	65602.1
12.12	2	67503.2
12.12	2	32828.5
12.12	2	82592.3
12.12	2	41612.6
12.12	2	57462.4
12.12	2	53355.6
12.12	2	32495
12.12	2	48301.4
12.12	2	25909.3
12.12	2	31604.9
12.12	2	54336.7
12.12	2	33961
12.12	2	42455.9
12.12	2	42339.8
12.12	2	50578.4
12.12	2	69473
12.12	2	44112
12.12	2	73234.3
12.12	2	48697.2
12.12	2	57323
12.12	2	59573
12.12	2	123169
12.12	2	17723.4
12.12	2	32584.4
12.12	2	19971.1
12.12	2	36609.3
12.12	2	30503.4
12.12	2	47349.6
12.12	2	42512
12.12	2	32484.4
12.12	2	67666.5
12.12	2	61545.6
12.12	2	65679.6
12.12	2	70153.9
12.12	2	32348.2
12.12	2	29092.8
12.12	2	43893.1
12.12	2	57268
12.12	2	64657.6
12.12	2	80613.5
12.12	2	65864.2
12.12	2	75261.5
12.12	2	41705.1
12.12	2	38442.6
12.12	2	54789.2
12.12	2	28222.7
12.12	2	83135.8
12.12	2	69932.4
12.12	2	52087.6
12.12	2	48455.2
18.1	1	22559.5
18.1	1	33648.4
18.1	1	44148.8
18.1	1	23003.3
18.1	1	36678.3
18.1	1	42461.5
18.1	1	59615.1
18.1	1	73695.9
18.1	1	49192.2
18.1	1	55612.1
18.1	1	53373.6
18.1	1	55181.4
18.1	1	35406.5
18.1	1	35325.9
18.1	1	55091.6
18.1	1	47295
18.1	1	33230.3
18.1	1	49060.4
18.1	1	47919
18.1	1	61545.5
18.1	1	41207.4
18.1	1	50363.8
18.1	1	66066.5
18.1	1	33091.8
18.1	1	29636.8
18.1	1	67207
18.1	1	30816
18.1	1	39665.8
18.1	1	46572.5
18.1	1	55037.9
18.1	1	25537.8
18.1	1	26185.6
18.1	1	74145.8
18.1	1	43456.2
18.1	1	46989.1
18.1	1	13242.9
18.1	1	30496.4
18.1	1	33966.6
18.1	1	20549.7
18.1	1	36055.5
18.1	1	45608.3
18.1	1	29519.4
18.1	1	29308.1
18.1	1	30901.4
18.1	1	38365.7
18.1	1	48619.3
18.1	1	39693.8
18.1	1	85482.6
18.1	1	39473.7
18.1	1	58645.7
18.2	1	19878.1
18.2	1	29189.9
18.2	1	11627.7
18.2	1	9739.11
18.2	1	7025.02
18.2	1	15215.2
18.2	1	20914.2
18.2	1	13117.2
18.2	1	6489.06
18.2	1	18032.1
18.2	1	19598.6
18.2	1	15079.3
18.2	1	10153.1
18.2	1	33058.1
18.2	1	84604
18.2	1	21807.8
18.2	1	38655.5
18.2	1	12696.6
18.2	1	17962.6
18.2	1	12692.4
18.2	1	26024.6
18.2	1	24484.6
18.2	1	17384
18.2	1	36299.9
18.2	1	31714.6
18.2	1	22393
18.2	1	31610.7
18.2	1	35685.5
18.2	1	32243.3
18.2	1	43154.1
18.2	1	22851.4
18.2	1	31897
18.2	1	17907.9
18.2	1	18448.4
18.2	1	29254.1
18.2	1	34260.2
18.2	1	34785.9
18.2	1	27996
18.2	1	29164.7
18.2	1	14020.2
18.2	1	49249.6
18.2	1	14496.8
18.2	1	25705.4
18.2	1	20395.5
18.2	1	41268.7
18.2	1	54518.9
18.2	1	13554.7
18.2	1	60449.7
18.2	1	45241.3
18.2	1	17039.6
18.3	1	38191.8
18.3	1	38540.5
18.3	1	50605.8
18.3	1	45101.1
18.3	1	50681.2
18.3	1	3423.49
18.3	1	13054.7
18.3	1	26237.9
18.3	1	29056.7
18.3	1	31997.2
18.3	1	31266.6
18.3	1	26423.8
18.3	1	29056.7
18.3	1	26770.2
18.3	1	64511.2
18.3	1	33113.3
18.3	1	27944
18.3	1	25624.1
18.3	1	44078.3
18.3	1	61146.3
18.3	1	72723.1
18.3	1	39108
18.3	1	40737.9
18.3	1	4617.73
18.3	1	20153.7
18.3	1	11494
18.3	1	23708.4
18.3	1	19778.8
18.3	1	13260.2
18.3	1	51641.2
18.3	1	54721
18.3	1	33742
18.3	1	30294.5
18.3	1	18532.3
18.3	1	12111.5
18.3	1	41826.6
18.3	1	20817.2
18.3	1	15694.5
18.3	1	41174.6
18.3	1	36262.1
18.3	1	42487.9
18.3	1	47801.8
18.3	1	19951.9
18.3	1	38800.4
18.3	1	13015.8
18.3	1	42227.2
18.3	1	27380.8
18.3	1	27006.5
18.3	1	11442.8
18.3	1	44978.5
18.4	2	24271.4
18.4	2	13490.1
18.4	2	20686.2
18.4	2	26552.1
18.4	2	44250.7
18.4	2	30856.1
18.4	2	46420
18.4	2	20706.6
18.4	2	17050.3
18.4	2	23228.3
18.4	2	16112.1
18.4	2	39553.2
18.4	2	53399.3
18.4	2	37125.7
18.4	2	36335.1
18.4	2	51156.6
18.4	2	56607.1
18.4	2	21146.9
18.4	2	39272.2
18.4	2	36401.8
18.4	2	44109.4
18.4	2	15952.8
18.4	2	30261.1
18.4	2	16129.4
18.4	2	43840.9
18.4	2	16454.5
18.4	2	37011.8
18.4	2	44782.4
18.4	2	6352.39
18.4	2	13167.3
18.4	2	39779.5
18.4	2	33949.4
18.4	2	28815.7
18.4	2	35596.5
18.4	2	14378.2
18.4	2	33595
18.4	2	40052.8
18.4	2	17131.7
18.4	2	56290.9
18.4	2	39779.9
18.4	2	37086
18.4	2	26560.3
18.4	2	31480.8
18.4	2	34694.5
18.4	2	27588.9
18.4	2	35823
18.4	2	70275.2
18.4	2	66608.8
18.4	2	92824.4
18.4	2	61551.6
18.5	2	39839.3
18.5	2	42433.6
18.5	2	53093.1
18.5	2	50154.7
18.5	2	36521.6
18.5	2	45069.5
18.5	2	30168.5
18.5	2	27798.8
18.5	2	21647.2
18.5	2	43852
18.5	2	48938.4
18.5	2	40608.3
18.5	2	65861.2
18.5	2	12716.2
18.5	2	16124.1
18.5	2	10266.2
18.5	2	29847.5
18.5	2	17782.7
18.5	2	21072.7
18.5	2	46562
18.5	2	12432.5
18.5	2	23379.9
18.5	2	41432.5
18.5	2	26147.9
18.5	2	107043
18.5	2	81511
18.5	2	50047.9
18.5	2	54971.3
18.5	2	44781.7
18.5	2	31613.8
18.5	2	33724.2
18.5	2	43272.1
18.5	2	36011.6
18.5	2	29278.4
18.5	2	35682.3
18.5	2	53437.2
18.5	2	68252.1
18.5	2	57618.9
18.5	2	56364.8
18.5	2	70610.1
18.5	2	71795
18.5	2	63327.8
18.5	2	51877
18.5	2	32051.4
18.5	2	40808.7
18.5	2	58406.2
18.5	2	30192.2
18.5	2	23610.7
18.5	2	29087.2
18.5	2	34387.4
18.6	2	65376.1
18.6	2	75706.1
18.6	2	73724.7
18.6	2	65115.2
18.6	2	95999.1
18.6	2	49319.3
18.6	2	51714.3
18.6	2	45222.6
18.6	2	31102.8
18.6	2	21036.3
18.6	2	24963.2
18.6	2	25743.7
18.6	2	31958.2
18.6	2	31811.6
18.6	2	18539.2
18.6	2	32592.3
18.6	2	11843.2
18.6	2	22135.2
18.6	2	14080.9
18.6	2	12826.9
18.6	2	17569.8
18.6	2	35724.1
18.6	2	25307.2
18.6	2	38333.6
18.6	2	42022.9
18.6	2	51042.5
18.6	2	40223.6
18.6	2	53184
18.6	2	17774.8
18.6	2	18376.1
18.6	2	31094.8
18.6	2	25739.1
18.6	2	60811.2
18.6	2	17398.3
18.6	2	70289.8
18.6	2	28744.9
18.6	2	17997.8
18.6	2	80797.6
18.6	2	6113.44
18.6	2	14037.2
18.6	2	6778.72
18.6	2	12642.9
18.6	2	14469.2
18.6	2	17022.4
18.6	2	10714.9
18.6	2	28392.2
18.6	2	22596.4
18.6	2	20661.7
18.6	2	39673.2
18.6	2	38677.5
18.7	2	8985.76
18.7	2	6939.71
18.7	2	6566.1
18.7	2	4281.96
18.7	2	6507.04
18.7	2	17928
18.7	2	20780.1
18.7	2	11353
18.7	2	7770.23
18.7	2	4885.96
18.7	2	7342.92
18.7	2	9919.12
18.7	2	7217.72
18.7	2	10437.4
18.7	2	16868.5
18.7	2	11265.4
18.7	2	26831.9
18.7	2	11921.9
18.7	2	22118.6
18.7	2	15164.5
18.7	2	15983.6
18.7	2	12754.4
18.7	2	27623.5
18.7	2	35350.4
18.7	2	6652.48
18.7	2	16484.6
18.7	2	16791.5
18.7	2	39357.8
18.7	2	13532
18.7	2	38719.3
18.7	2	52542.6
18.7	2	41561
18.7	2	37568.4
18.7	2	18543.6
18.7	2	16626.1
18.7	2	37858.1
18.7	2	22604.9
18.7	2	20377.1
18.7	2	24807.3
18.7	2	29653.6
18.7	2	29429
18.7	2	29691.2
18.7	2	24328.5
18.7	2	15813.8
18.7	2	13875.4
18.7	2	60025.3
18.7	2	42205
18.7	2	23559.7
18.7	2	21968.3
18.7	2	10192.5
19.1	3	64752.7
19.1	3	68866.2
19.1	3	83572.3
19.1	3	60393.6
19.1	3	67766
19.1	3	77409
19.1	3	51664.2
19.1	3	63242.1
19.1	3	93528
19.1	3	54160.3
19.1	3	26591
19.1	3	72556.9
19.1	3	45693
19.1	3	47302.9
19.1	3	30354.5
19.1	3	34933.3
19.1	3	39663.9
19.1	3	36015.5
19.1	3	47215.7
19.1	3	43754.6
19.1	3	11796.3
19.1	3	31973.9
19.1	3	99762.5
19.1	3	64566.5
19.1	3	36537.9
19.1	3	67513.9
19.1	3	75184.5
19.1	3	66004.2
19.1	3	67898
19.1	3	56478.8
19.1	3	40527.3
19.1	3	62320.3
19.1	3	77288.7
19.1	3	83556.8
19.1	3	71006
19.1	3	88495.5
19.1	3	87009.9
19.1	3	81209.4
19.1	3	73726.8
19.1	3	79146.7
19.1	3	21717.6
19.1	3	86793.8
19.1	3	49917.5
19.1	3	90754.8
19.1	3	75622
19.1	3	57210
19.1	3	50655.7
19.1	3	72804.6
19.1	3	82705.6
19.1	3	37333.5
22.2	1	33411.6
22.2	1	70178.1
22.2	1	43758.3
22.2	1	21026
22.2	1	39199
22.2	1	29563
22.2	1	13907.9
22.2	1	30365
22.2	1	29603.9
22.2	1	32294.1
22.2	1	43980.8
22.2	1	27300.6
22.2	1	27056.8
22.2	1	35489.2
22.2	1	13314.5
22.2	1	22864
22.2	1	13600.5
22.2	1	41222.8
22.2	1	30423.8
22.2	1	14041.6
22.2	1	37780.2
22.2	1	10198.6
22.2	1	16833.8
22.2	1	9840.56
22.2	1	10630.8
22.2	1	53322.4
22.2	1	16668.1
22.2	1	18532.4
22.2	1	35626.1
22.2	1	42400
22.2	1	17265
22.2	1	38833.1
22.2	1	65600.6
22.2	1	47803
22.2	1	61200.9
22.2	1	41119.2
22.2	1	14610.3
22.2	1	24092
22.2	1	14054.2
22.2	1	36639.5
22.2	1	39684.4
22.2	1	43459.4
22.2	1	23573.2
22.2	1	14806.4
22.2	1	45696.8
22.2	1	31089.1
22.2	1	56129.8
22.2	1	17991.4
22.2	1	11781.7
22.2	1	25439.1
23.1	1	34166.7
23.1	1	17749.1
23.1	1	18533.7
23.1	1	18050.5
23.1	1	35725.5
23.1	1	81961.9
23.1	1	33549.3
23.1	1	25494
23.1	1	49136.9
23.1	1	27102.3
23.1	1	45190.3
23.1	1	17276.1
23.1	1	15094
23.1	1	6313.17
23.1	1	21736.1
23.1	1	10404.1
23.1	1	19597.5
23.1	1	24747
23.1	1	39373.3
23.1	1	16455.4
23.1	1	15489.9
23.1	1	4195.75
23.1	1	12004.7
23.1	1	34634.5
23.1	1	23726.3
23.1	1	41153.2
23.1	1	4365.96
23.1	1	10703.6
23.1	1	14379.5
23.1	1	33852.8
23.1	1	51827.2
23.1	1	45024.7
23.1	1	15749.2
23.1	1	38723.1
23.1	1	22518.3
23.1	1	27028.8
23.1	1	18486.5
23.1	1	11492.5
23.1	1	13378.7
23.1	1	15763.1
23.1	1	14471
23.1	1	26931.4
23.1	1	24565.4
23.1	1	46805.8
23.1	1	27371
23.1	1	31456.3
23.1	1	16300.1
23.1	1	25716.1
23.1	1	12582.6
23.1	1	24032.3
23.3	1	25717.2
23.3	1	27991.1
23.3	1	51459
23.3	1	16107.5
23.3	1	23882.8
23.3	1	45878.7
23.3	1	41915.3
23.3	1	33598.3
23.3	1	79061.7
23.3	1	41571.5
23.3	1	110970
23.3	1	81082.6
23.3	1	6675.84
23.3	1	21424.1
23.3	1	23750.9
23.3	1	23668.3
23.3	1	12439.9
23.3	1	39758.6
23.3	1	15237.2
23.3	1	59611.3
23.3	1	24111.9
23.3	1	15939.3
23.3	1	37884.3
23.3	1	47295.1
23.3	1	35644.9
23.3	1	28280.4
23.3	1	41336.5
23.3	1	48092.3
23.3	1	22946.7
23.3	1	41229.6
23.3	1	42208.3
23.3	1	34794.6
23.3	1	64280.7
23.3	1	41274.8
23.3	1	72909.1
23.3	1	87192.7
23.3	1	64398.1
23.3	1	60853.8
23.3	1	24419.9
23.3	1	40800
23.3	1	54938.5
23.3	1	72332.4
23.3	1	46054.5
23.3	1	30064.1
23.3	1	27883.6
23.3	1	57715.8
23.3	1	84802.4
23.3	1	57917
23.3	1	36176.2
23.3	1	41512.7
30.1	1	27236.4
30.1	1	31704.7
30.1	1	44614.2
30.1	1	66033.3
30.1	1	37143.6
30.1	1	67179.7
30.1	1	44277.1
30.1	1	73393.5
30.1	1	67742
30.1	1	42990.9
30.1	1	41408.5
30.1	1	40615.2
30.1	1	33661.9
30.1	1	24219.3
30.1	1	49586.8
30.1	1	41145.4
30.1	1	60781.8
30.1	1	55694.5
30.1	1	48021.4
30.1	1	53905.4
30.1	1	37936.5
30.1	1	31930.4
30.1	1	47351.9
30.1	1	29121.3
30.1	1	28015.5
30.1	1	58372.2
30.1	1	69155.2
30.1	1	42854.3
30.1	1	44360.9
30.1	1	44484.5
30.1	1	26405.5
30.1	1	22222.8
30.1	1	50179.2
30.1	1	48268
30.1	1	30955
30.1	1	46698.1
30.1	1	34943.2
30.1	1	48490.5
30.1	1	55626.9
30.1	1	63525.3
30.1	1	59728.6
30.1	1	29016.4
30.1	1	51482.3
30.1	1	54566.4
30.1	1	67644.1
30.1	1	19696.2
30.1	1	34550.3
30.1	1	32107.4
30.1	1	47292.1
30.1	1	33707.4
23.2	1	20826.2
23.2	1	45863.3
23.2	1	45436.8
23.2	1	55863.3
23.2	1	60478.6
23.2	1	23385.2
23.2	1	29570.4
23.2	1	19994.1
23.2	1	21221.4
23.2	1	15401.3
23.2	1	15953.8
23.2	1	46596.5
23.2	1	101759
23.2	1	20718.2
23.2	1	35786.6
23.2	1	21313.9
23.2	1	54951.4
23.2	1	56637.7
23.2	1	39791
23.2	1	22196.7
23.2	1	15232.7
23.2	1	18834.5
23.2	1	28171.5
23.2	1	56964.4
23.2	1	21649.8
23.2	1	15666.7
23.2	1	30037.1
23.2	1	17312.4
23.2	1	32783.4
23.2	1	43349.9
23.2	1	54061
23.2	1	78470.5
23.2	1	53673.3
23.2	1	63519.9
23.2	1	44200.3
23.2	1	54293.6
23.2	1	30690.5
23.2	1	65365.2
23.2	1	43995.4
23.2	1	64484.6
23.2	1	92695.4
23.2	1	74597.2
23.2	1	49259.5
23.2	1	34922.9
23.2	1	62709.7
23.2	1	62159.4
23.2	1	36291.1
23.2	1	88111.4
23.2	1	88351

## Sheet: NMR
Individual	Age Class	Fluorescence
M1	1	40547.9
M1	1	50585.1
M1	1	89769.1
M1	1	66061.9
M1	1	63046.3
M1	1	26635.2
M1	1	42194.4
M1	1	17308.9
M1	1	37914
M1	1	72675.6
M1	1	35468.9
M1	1	41124.7
M1	1	30621.2
M1	1	30828.5
M1	1	28998.6
M1	1	39236.1
M1	1	17337.8
M1	1	96090.3
M1	1	13079.4
M1	1	22388.5
M1	1	9618.74
M1	1	17563.8
M1	1	46175.1
M1	1	40165.3
M1	1	118181
M1	1	19905.8
M1	1	49880.4
M1	1	19851.4
M1	1	106812
M1	1	56592.2
M1	1	20030
M1	1	16582.2
M1	1	32305
M1	1	27389.1
M1	1	32868.2
M1	1	12744.3
M1	1	33221.5
M1	1	24354.6
M1	1	59381.5
M1	1	156696
M1	1	22160.8
M1	1	57745.8
M1	1	18982.9
M1	1	31989.1
M1	1	50606.1
M1	1	34669.5
M1	1	46830.8
M1	1	34809.8
M1	1	23635.5
M1	1	17461.1
M2	1	23416
M2	1	48622.9
M2	1	28814.9
M2	1	4736.01
M2	1	40481.3
M2	1	37476
M2	1	19557.7
M2	1	42077.5
M2	1	9902.27
M2	1	31893.6
M2	1	57562.2
M2	1	19764.1
M2	1	116394
M2	1	21149
M2	1	13149.8
M2	1	99006.4
M2	1	93470
M2	1	29519
M2	1	95232.6
M2	1	54527.2
M2	1	84632.1
M2	1	48608.3
M2	1	15127.6
M2	1	30978.5
M2	1	14558.3
M2	1	19547.7
M2	1	44279.8
M2	1	40937.5
M2	1	103158
M2	1	89034
M2	1	39846.3
M2	1	40296.3
M2	1	19204.2
M2	1	33232.6
M2	1	50310.1
M2	1	43721
M2	1	83898
M2	1	81705.5
M2	1	59648.1
M2	1	49134.3
M2	1	20161.4
M2	1	36513.4
M2	1	45662.9
M2	1	107749
M2	1	41785.1
M2	1	33929.2
M2	1	35125
M2	1	61715.3
M2	1	74913.6
M2	1	33817.5
F798	1	47107
F798	1	54950.5
F798	1	52201.5
F798	1	28022
F798	1	25171
F798	1	45151
F798	1	14085.2
F798	1	10028.1
F798	1	26152.9
F798	1	47669.3
F798	1	33009.6
F798	1	33122.7
F798	1	48611.8
F798	1	26514.1
F798	1	37200.6
F798	1	4907.64
F798	1	7958.63
F798	1	53399.1
F798	1	13892.7
F798	1	31982.5
F798	1	28302.5
F798	1	30761.5
F798	1	60841.2
F798	1	15683
F798	1	31947.1
F798	1	13159.8
F798	1	17306.9
F798	1	25938.8
F798	1	10520.6
F798	1	43248.5
F798	1	31119.7
F798	1	98741.7
F798	1	8064.27
F798	1	18839.7
F798	1	54895.8
F798	1	36138.4
F798	1	32011.2
F798	1	35283.3
F798	1	49875.9
F798	1	78742.7
F798	1	7777.22
F798	1	24045.2
F798	1	13132.5
F798	1	15799.6
F798	1	14378.1
F798	1	5433.98
F798	1	8393.83
F798	1	33956.2
F798	1	21134.4
F798	1	9586.71
F048	2	29137.5
F048	2	21760.4
F048	2	29166.8
F048	2	27647.4
F048	2	56236
F048	2	24799.2
F048	2	42435.9
F048	2	12533.3
F048	2	17915.3
F048	2	21880
F048	2	93101.5
F048	2	25122.7
F048	2	76117.9
F048	2	61050.4
F048	2	19543.8
F048	2	17072.7
F048	2	29916.9
F048	2	69025.7
F048	2	35097.1
F048	2	49501.9
F048	2	58061.8
F048	2	35391.2
F048	2	24487.4
F048	2	14167
F048	2	55874.1
F048	2	35705.3
F048	2	30921.2
F048	2	23170.5
F048	2	59474.7
F048	2	9600.42
F048	2	15909.7
F048	2	27341.4
F048	2	32033.3
F048	2	26889.1
F048	2	25394.8
F048	2	15835.9
F048	2	66758.7
F048	2	45964.6
F048	2	113382
F048	2	44491
F048	2	40275
F048	2	49297.7
F048	2	12798.5
F048	2	100368
F048	2	17727.2
F048	2	22197.2
F048	2	66723.6
F048	2	38416.8
F048	2	48821.3
F048	2	35273.6
F775	2	22266.2
F775	2	45378.4
F775	2	27234.2
F775	2	52019.6
F775	2	31738.6
F775	2	47014
F775	2	120457
F775	2	56148.9
F775	2	63523.1
F775	2	23436.1
F775	2	69803.2
F775	2	24517.8
F775	2	107991
F775	2	17440.2
F775	2	43247.9
F775	2	22051.5
F775	2	44524
F775	2	32852.2
F775	2	25722.5
F775	2	11175.8
F775	2	31655.2
F775	2	48676.8
F775	2	30338.6
F775	2	93678.4
F775	2	35922.3
F775	2	45749
F775	2	41832.1
F775	2	62571.4
F775	2	69627.3
F775	2	53939.4
F775	2	38163.4
F775	2	75195.4
F775	2	133469
F775	2	38046.9
F775	2	62781.4
F775	2	49833.3
F775	2	65281.5
F775	2	26444.4
F775	2	36665.8
F775	2	36748.8
F775	2	40454.2
F775	2	40942.6
F775	2	29228.6
F775	2	77450.6
F775	2	46822.3
F775	2	41354.2
F775	2	56104.9
F775	2	67580
F775	2	62636.6
F775	2	33405.6
M124	2	57284.1
M124	2	45349.2
M124	2	37343
M124	2	70190.8
M124	2	70007
M124	2	56405.3
M124	2	41336.7
M124	2	47414.9
M124	2	66767.8
M124	2	44504.4
M124	2	52357.2
M124	2	68309.1
M124	2	73677.1
M124	2	45933.8
M124	2	126180
M124	2	26152.9
M124	2	57447.3
M124	2	59615.1
M124	2	48073.9
M124	2	22876.7
M124	2	64293.7
M124	2	58671.3
M124	2	51408.8
M124	2	37424.9
M124	2	57009.8
M124	2	68724
M124	2	40791.4
M124	2	51639
M124	2	37960.6
M124	2	41823.4
M124	2	39000.5
M124	2	31380.8
M124	2	19924.6
M124	2	12000.8
M124	2	92853.6
M124	2	103045
M124	2	104571
M124	2	32757.5
M124	2	28752
M124	2	29950.9
M124	2	30457.6
M124	2	58891
M124	2	54626.4
M124	2	56880.9
M124	2	43681.1
M124	2	34149.6
M124	2	54199.9
M124	2	56915.5
M124	2	64673.8
M124	2	86790.4
M353	2	56962.1
M353	2	47932.3
M353	2	56694.2
M353	2	101656
M353	2	87165.9
M353	2	72797.8
M353	2	58017
M353	2	67787.4
M353	2	115248
M353	2	56696.1
M353	2	55078.3
M353	2	40998.7
M353	2	86032.5
M353	2	115026
M353	2	50620.3
M353	2	59465.8
M353	2	54825.3
M353	2	76813.4
M353	2	99657.2
M353	2	80670.5
M353	2	56610.5
M353	2	82307.8
M353	2	79613.5
M353	2	61214.4
M353	2	103603
M353	2	83325.6
M353	2	94682.7
M353	2	61840.3
M353	2	67689.9
M353	2	63043.9
M353	2	87026.8
M353	2	38236.6
M353	2	77187.9
M353	2	96077.1
M353	2	75621.3
M353	2	20430.6
M353	2	63273.1
M353	2	63120.6
M353	2	61289
M353	2	94090.1
M353	2	93198.1
M353	2	67845.2
M353	2	88646.8
M353	2	30105.9
M353	2	56384.5
M353	2	58051
M353	2	51476.4
M353	2	49903.8
M353	2	65198
M353	2	78736.2
F894	3	3630.8
F894	3	5579.05
F894	3	25815.1
F894	3	11966.1
F894	3	19899.4
F894	3	50893.4
F894	3	19987
F894	3	8202.38
F894	3	23148.4
F894	3	52194
F894	3	15945.1
F894	3	26854.3
F894	3	13732.6
F894	3	9377.93
F894	3	30054.7
F894	3	13194.2
F894	3	31616.8
F894	3	40913.2
F894	3	14887.4
F894	3	76133.9
F894	3	20637.1
F894	3	10679.1
F894	3	8054.45
F894	3	24068.8
F894	3	8970.2
F894	3	14897
F894	3	45182.1
F894	3	19648.9
F894	3	20314.8
F894	3	15964.7
F894	3	67748.7
F894	3	68277.5
F894	3	35020.2
F894	3	11528.3
F894	3	6010.91
F894	3	6892.04
F894	3	27080.6
F894	3	8017.78
F894	3	40564
F894	3	6165.69
F894	3	38328.5
F894	3	29836.7
F894	3	11866.5
F894	3	12955.6
F894	3	7798.26
F894	3	11936.7
F894	3	5602.78
F894	3	45827.7
F894	3	74655
F894	3	41150.3
F535	3	56722.1
F535	3	37629.6
F535	3	15375.5
F535	3	40694.2
F535	3	32852.2
F535	3	87625.3
F535	3	39601.1
F535	3	63191.4
F535	3	62649.7
F535	3	19929.4
F535	3	16429.8
F535	3	123531
F535	3	107333
F535	3	23726.7
F535	3	80988
F535	3	37745.6
F535	3	34179.1
F535	3	36021
F535	3	67995.4
F535	3	35572.5
F535	3	30796.1
F535	3	18595.1
F535	3	54068.3
F535	3	73906.6
F535	3	106418
F535	3	53174
F535	3	56080.5
F535	3	61269.7
F535	3	34667.4
F535	3	38045.5
F535	3	51590.1
F535	3	28752.7
F535	3	26869.7
F535	3	26817.4
F535	3	23651
F535	3	26955.2
F535	3	99627.6
F535	3	20676.7
F535	3	20721.5
F535	3	6001.63
F535	3	9653.31
F535	3	57849
F535	3	35096.5
F535	3	16664
F535	3	25952.2
F535	3	31001.8
F535	3	30226.4
F535	3	29269.3
F535	3	38060.8
F535	3	36789.6
