# Supplementary material for: Patterns of telomere length with age in African mole-rats: New insights from quantitative fluorescence in situ hybridisation (qFISH)
Source: PeerJ journal article supplement (doi:10.7717/peerj.10498), 2020-12-04
Supplement: Supplementary_Table_1.pdf [file Supplementary_Table_1.pdf]

| Species | Individual | Sex    | Age class | Age category |
|---------|------------|--------|-----------|--------------|
| DMR     | 2.2        | Female | 5         | Old          |
| DMR     | 2.5        | Female | 5         | Old          |
| DMR     | 2.6        | Female | 5         | Old          |
| DMR     | 8.4        | Male   | 5         | Old          |
| DMR     | 8.5        | Male   | 5         | Old          |
| DMR     | 9.11       | Female | 1         | Young        |
| DMR     | 9.13       | Female | 5         | Old          |
| DMR     | 9.5        | Female | 1         | Young        |
| DMR     | 11.6       | Female | 1         | Young        |
| DMR     | 11.9       | Male   | 1         | Young        |
| DMR     | 11.10      | Male   | 1         | Young        |
| DMR     | 11.11      | Female | 1         | Young        |
| MMR     | 7.1        | Female | 2         | Middle-aged  |
| MMR     | 7.2        | Female | 2         | Middle-aged  |
| MMR     | 10.1       | Female | 4         | Old          |
| MMR     | 12.1       | Male   | 4         | Old          |
| MMR     | 12.2       | Male   | 4         | Old          |
| MMR     | 12.3       | Male   | 2         | Middle-aged  |
| MMR     | 12.4       | Female | 4         | Old          |
| MMR     | 12.5       | Male   | 3         | Middle-aged  |
| MMR     | 12.6       | Female | 3         | Middle-aged  |
| MMR     | 12.7       | Female | 3         | Middle-aged  |
| MMR     | 12.8       | Female | 3         | Middle-aged  |
| MMR     | 12.9       | Male   | 3         | Middle-aged  |
| MMR     | 12.11      | Female | 2         | Middle-aged  |
| MMR     | 12.12      | Male   | 2         | Middle-aged  |
| MMR     | 18.1       | Female | 1         | Young        |
| MMR     | 18.2       | Female | 1         | Young        |
| MMR     | 18.3       | Female | 1         | Young        |
| MMR     | 18.4       | Male   | 3         | Middle-aged  |
| MMR     | 18.5       | Male   | 3         | Middle-aged  |

|     |      |        |     |             |
|-----|------|--------|-----|-------------|
| MMR | 18.6 | Male   | 3   | Middle-aged |
| MMR | 18.7 | Female | 2   | Middle-aged |
| MMR | 19.1 | Female | 4   | Old         |
| MMR | 22.2 | Male   | 1   | Young       |
| MMR | 23.1 | Male   | 1   | Young       |
| MMR | 23.2 | Male   | 1   | Young       |
| MMR | 23.3 | Male   | 1   | Young       |
| MMR | 30.1 | Female | 1   | Young       |
| NMR | F535 | Female | 23  | Old         |
| NMR | F798 | Female | 4   | Young       |
| NMR | F894 | Female | 17  | Old         |
| NMR | M1   | Male   | 1.5 | Young       |
| NMR | M2   | Male   | 1.5 | Young       |
| NMR | F048 | Male   | 9   | Middle-aged |
| NMR | F775 | Male   | 9   | Middle-aged |
| NMR | F791 | Female | 22  | Old         |
| NMR | M825 | Male   | 2   | Young       |
| NMR | M781 | Male   | 2   | Young       |
| NMR | M124 | Male   | 10  | Middle-aged |
| NMR | M353 | Male   | 10  | Middle-aged |
| NMR | F10  | Female | 20  | Old         |

**Bennett NC, Jarvis JUM, Wallace DB. 1990.** The relative age structure and body masses of complete wild-captured colonies of two social mole-rats, the common mole-rat, *Cryptomys hottentotus hottentotus* and the Damaraland mole-rat, *Cryptomys damarensis*. *Journal of Zoology* **220**:469–485 DOI:10.1111/j.1469-7998.1990.tb04319.x.
